# Supplementary material for: Pharmacokinetics and the Dermal Absorption of Bromochlorophene, a Cosmetic Preservative Ingredient, in Rats
Source: MDPI journal article supplement (doi:10.3390/toxics10060329), 2022-06-16
Supplement: s1 [file s1]

# Supplementary Materials: Pharmacokinetics and the Dermal Absorption of Bromochlorophene, A Cosmetic Preservative Ingredient, in Rats

Yong- Jae Lee, Hyang Yeon Kim, Quynh Lien Pham, Jung Dae Lee and Kyu-Bong Kim

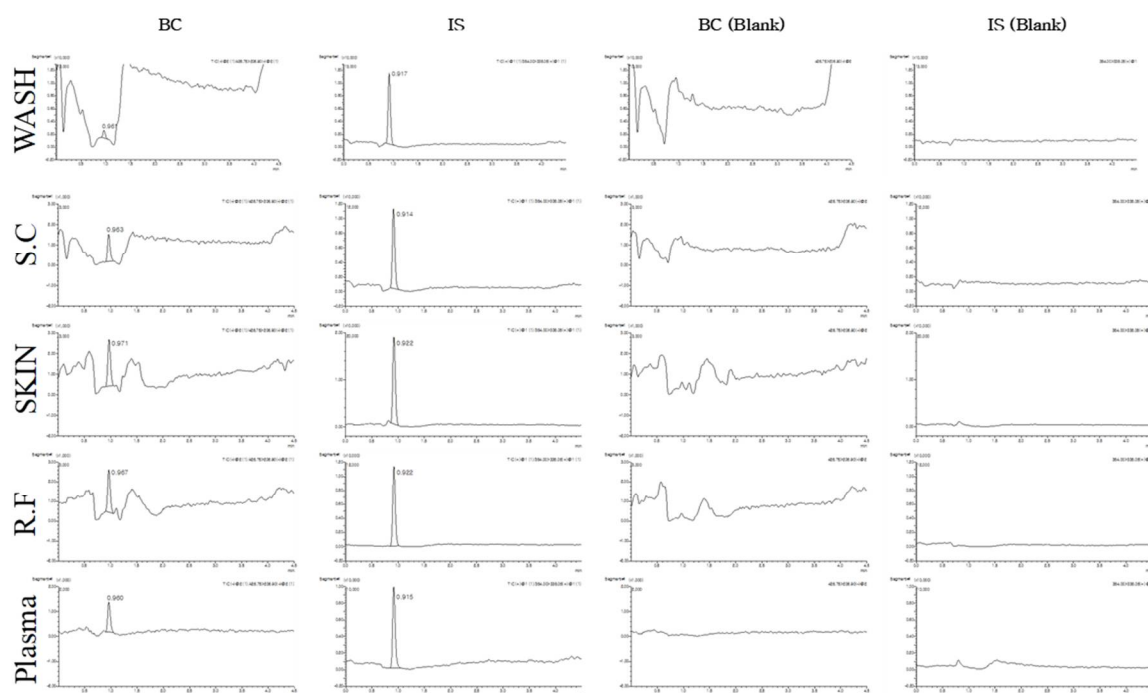

**Figure S1.** Representative MRM chromatograms of BCP and IS at LLOQ in WASH, SC, SKIN, RF, and plasma.

**Table S1.** Physicochemical properties of BCP.

|                        |                                                                                    |            |
|------------------------|------------------------------------------------------------------------------------|------------|
| Structure of chemical  | 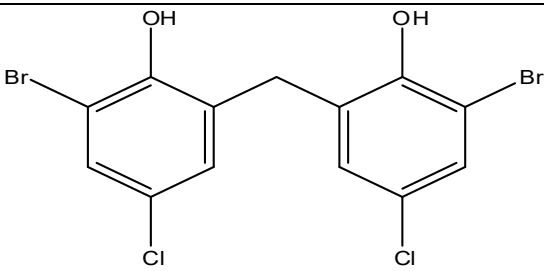 |            |
| INCI name              | Bromochlorophene                                                                   |            |
| EINECS name            | 2,2'-Methylenbis (6-bromo-4-chlorophenol)                                          |            |
| CAS number             | 15435-29-7                                                                         |            |
| EC number              | 239-446-8                                                                          |            |
| Molecular formula      | C <sub>13</sub> H <sub>8</sub> Br <sub>2</sub> Cl <sub>2</sub> O <sub>2</sub>      |            |
| Molar mass             | 426.92                                                                             |            |
| Solubility in water    | < 5 mg/L                                                                           |            |
| Log P <sub>ow</sub>    | 6.12                                                                               |            |
| Effect of preservative | gram-positive bacteria                                                             | good       |
|                        | gram-negative bacteria                                                             | moderate   |
|                        | yeasts / moulds                                                                    | inadequate |
|                        | head-space protection                                                              | no         |

**Table S2.** Contents of gel and cream formulations containing 1 % BCP.

| Content                    | Gel (%w/w) | Cream (%w/w) |
|----------------------------|------------|--------------|
| Distilled water            | 75.4       | 54           |
| Glycerin                   | 23.6       | 4            |
| Grape seed oil             |            | 28           |
| Benzyl alcohol             |            | 5            |
| Olive glutinate            |            | 3            |
| Hydroxypropyl cyclodextrin |            | 5            |
| Bromochlorophene           | 1          | 1            |
| Total                      | 100        | 100          |

**Table S3.** Analytical conditions of BCP and IS of LC-MS/MS.

|                              | Bromochlorophene                                                 | Felodipine (IS) |
|------------------------------|------------------------------------------------------------------|-----------------|
| Instrument                   |                                                                  |                 |
| HPLC                         | LC-30AD-1 and -2, SIL-30AC, CTO-20AC (Shimadzu, Kyoto, Japan)    |                 |
| MS/MS                        | LCMS-8050 (Shimadzu, Kyoto, Japan)                               |                 |
| Column                       | Zorbax SB-C8 (150 × 2.1 mm, i.d. 3.5 μm , Agilent, USA)          |                 |
| Guard column                 | Security Guard Cartridges RP-1 (4 × 3.0 mm; Phenomenex, CA, USA) |                 |
| Chromatographic condition    |                                                                  |                 |
| Mobile phase                 | 95% ACN in 0.1% formic acid                                      |                 |
| Column oventemperature (°C)  | 40                                                               |                 |
| Autosampler temperature (°C) | 10                                                               |                 |
| Flow rate (mL/min)           | 0.5                                                              |                 |
| Running time (min)           | 4.5                                                              |                 |
| Injection volume (mL)        | 5                                                                |                 |
| MSMS condition               |                                                                  |                 |
| Ionization mode              | Electro spray ionization, multi reaction monitoring              |                 |
| Polarity                     | Negative                                                         | Positive        |
| Mass transition (m/z)        | 426.75 → 206.90                                                  | 384.00 → 338.05 |
| Dwell time (ms)              | 100                                                              | 100             |
| Q1 pre vias                  | 19                                                               | -13             |
| Q3 pre vias                  | 21                                                               | -25             |
| Collision energy (V)         | 26                                                               | -14             |
| Gas flow (L/min)             | 10                                                               |                 |
| Neubulizing gas flow (L/min) | 3                                                                |                 |
| Source temperature (°C)      | 300                                                              |                 |
